# Supplementary material for: Comparative Proteomics Analysis between Maize and Sorghum Uncovers Important Proteins and Metabolic Pathways Mediating Drought Tolerance
Source: MDPI journal article supplement (doi:10.3390/life13010170), 2023-01-06
Supplement: s1 [file s1]

**Table S1** Details of LC-MS/MS data acquisition**Full Scan**

|                             |                           |
|-----------------------------|---------------------------|
| Resolution                  | 70,000 (@ <i>m/z</i> 200) |
| AGC target value            | 1e6                       |
| Scan range                  | 350-2000 <i>m/z</i>       |
| Maximal injection time (ms) | 250                       |

**Data-dependent MS/MS**

|                                |                           |
|--------------------------------|---------------------------|
| Inclusion                      | Off                       |
| Number of MS/MS scans produced | 1,000,863                 |
| Resolution                     | 17,500 (@ <i>m/z</i> 200) |
| AGC target value               | 1e5                       |
| Maximal injection time (ms)    | 50                        |
| Loop Count                     | 5                         |
| Isolation window width (Da)    | 2                         |
| NCE (%)                        | 27                        |

**Data-dependent Settings**

|                       |             |
|-----------------------|-------------|
| Underfill ratio (%)   | 1           |
| Charge exclusion      | 1, 7, 8, >8 |
| Peptide match         | Preferred   |
| Exclusion isotopes    | On          |
| Dynamic exclusion (s) | 60          |
