# Supplementary material for: Comparative Proteomics Analysis between Maize and Sorghum Uncovers Important Proteins and Metabolic Pathways Mediating Drought Tolerance
Source: MDPI journal article supplement (doi:10.3390/life13010170), 2023-01-06

**Figure S1** One-dimensional leaf proteins of *Zea mays* (a) and *Sorghum bicolor* (b) from five biological replicates. Total soluble protein (10  $\mu$ g) of leaf tissue for each plant species was loaded onto 12 % SDS-PAGE gels. Lane M is the molecular weight marker; Lanes 1-10 show protein profiles from five independent biological replicate extractions for the leaf tissue for each plant species. Well-watered (WW), water deficit (WD).

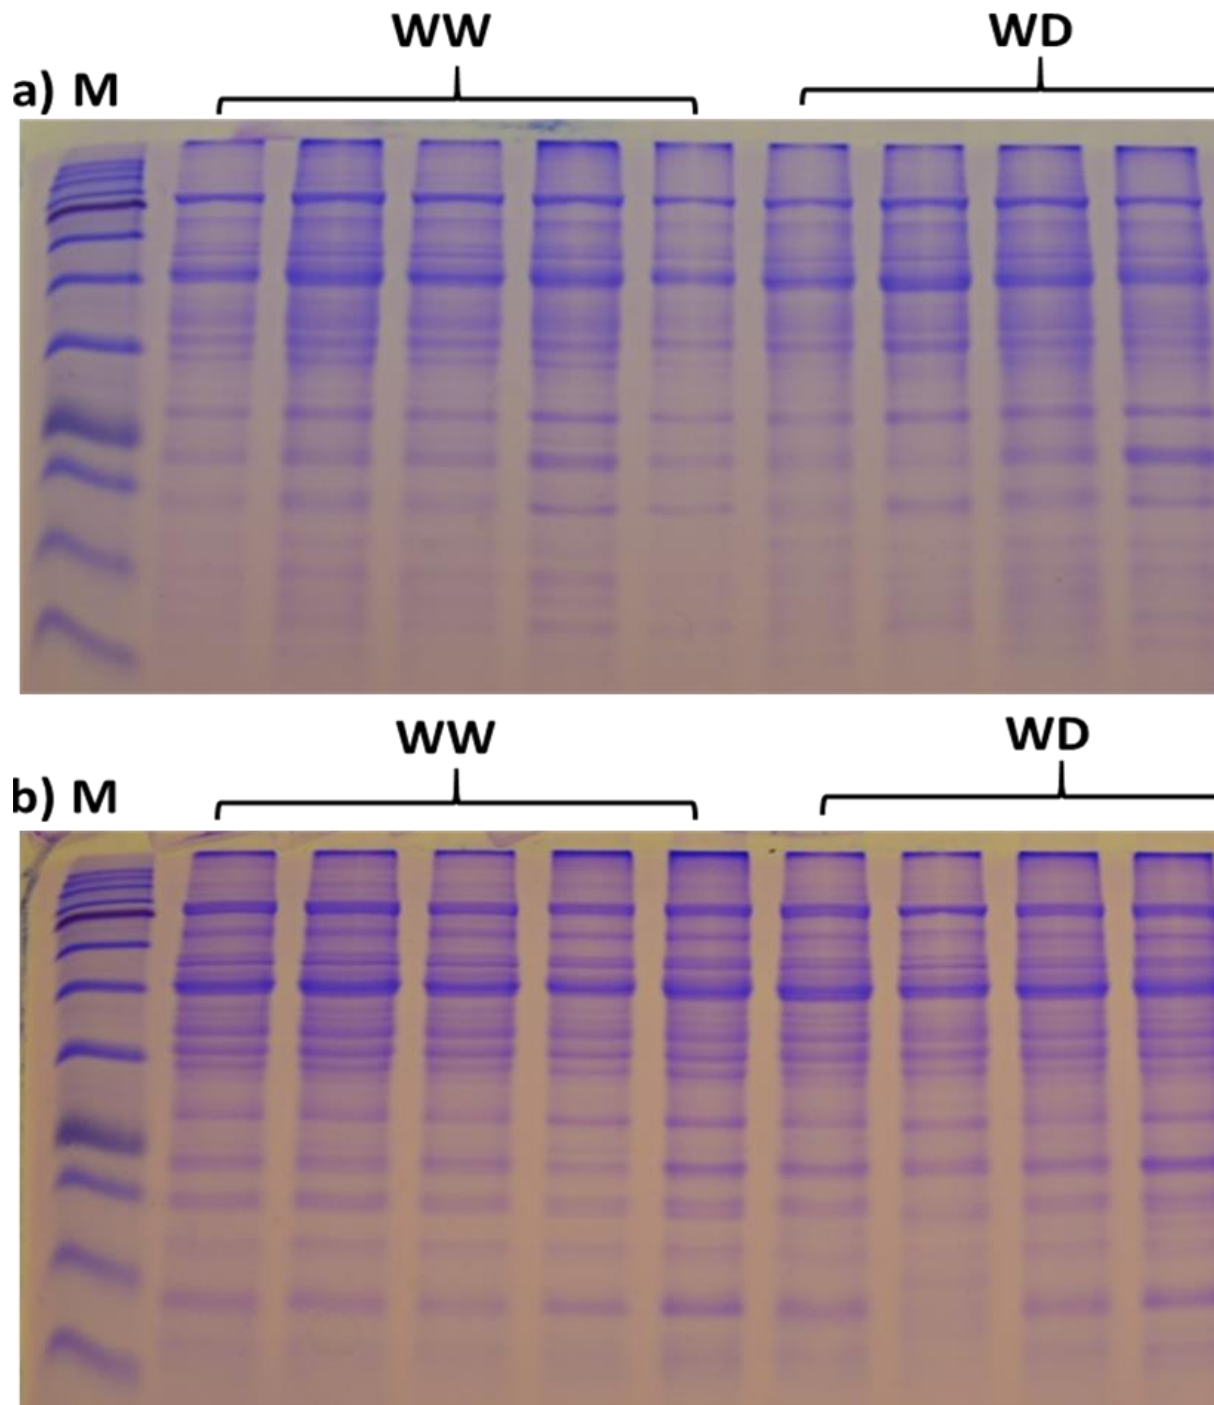

Supplement: s1 [file s1]
