# Supplementary material for: Comparative Proteomics Analysis between Maize and Sorghum Uncovers Important Proteins and Metabolic Pathways Mediating Drought Tolerance
Source: Life (Basel). 2023 Jan 6;13(1):170. doi: 10.3390/life13010170 (PMC9863747; doi:10.3390/life13010170)
Supplement: Supplementary file 1 [file life-13-00170-s001.zip › Supplementary Table S2.xlsx]

## Sheet: 20180913-ResultTable-Quasipoiss
Table S2 Orthologs with different abundance between maize and sorghum.
Rindex	Accession	Cluster	Count	Coverage	Protein	Peptides	Matches	PSMs	maize	maize.dry	md1	md2	md3	md4	md5	maize.wet	mw1	mw2	mw3	mw4	mw5	sorghum	sorghum.dry	sd1	sd2	sd3	sd4	sd5	sorghum.wet	sw1	sw2	sw3	sw4	sw5	description	Origin	Pspecies	PdryWet	PSFoldChange	PDFoldChange	Qspecies	QdryWet	LowestQ
2101	GRMZM2G084279_P01/Sobic.004G151600.1.p	930	1	30.8475	1124	9	10	110	110	59	15	12	11	9	12	51	8	9	11	12	11	39	20	4	4	4	3	5	19	4	3	4	3	5	pacid=30985639	external	1.88451e-09	0.145622	1.49596	0.174498	1.49065e-06	0.507432	1.49065e-06
413	GRMZM2G161097_P01/Sobic.002G053900.1.p	212	1	5.17241	1925	2	2	21	11	5	1	1	2	0	1	6	1	2	1	1	1	50	25	5	6	5	4	5	25	5	5	5	5	5	pacid=30997909	external	5.36757e-09	0.765941	-2.18442	-0.0473057	2.12287e-06	0.942238	2.12287e-06
921	GRMZM2G030628_P01/Sobic.007G113600.2.p	807	1	20.4036	1407	8	8	63	60	30	8	6	7	3	6	30	6	7	5	6	6	8	4	1	1	1	0	1	4	0	1	1	1	1	pacid=31049717	external	1.12832e-08	1	2.90689	0	2.97501e-06	1	2.97501e-06
231	GRMZM2G117755_P02,GRMZM2G117755_P01,Sobic.007G120401.1.p	1738	3	33.6444	2639	9	12	109	11	7	1	2	3	0	1	4	1	1	1	1	0	98	51	11	10	12	8	10	47	12	6	10	10	9	pacid=37937108 transcript=Sobic.007G120401.1 locus=Sobic.007G120401 ID=Sobic.007G120401.1.v3.2 annot-version=v3.1.1	internal	2.7253e-08	0.361834	-3.15528	0.185556	5.38928e-06	0.71732	5.38928e-06
558	GRMZM5G828229_P02/Sobic.007G038600.1.p	1394	1	24.4	1957	11	12	71	70	41	9	8	9	7	8	29	7	7	6	5	4	13	8	1	2	1	2	2	5	2	0	2	0	1	pacid=31004475	external	4.40517e-08	0.014165	2.42884	0.527247	6.96898e-06	0.258628	6.96898e-06
551	GRMZM5G815453_P01,GRMZM2G385635_P01,GRMZM2G448344_P01,GRMZM2G360821_P01/Sobic.005G194400.1.p	301	4	48.7603	2985	36	55	1115	703	309	69	66	73	34	67	394	70	110	68	77	69	274	126	26	22	31	20	27	148	30	28	27	32	31	pacid=31022943	external	6.25034e-08	0.0314473	1.35935	-0.317277	8.24003e-06	0.307507	8.24003e-06
1401	GRMZM2G054803_P01/Sobic.002G130000.2.p	818	1	16.6124	964	4	4	19	19	19	4	3	5	3	4	0	0	0	0	0	0	6	6	1	2	1	1	1	0	0	0	0	0	0	pacid=30998257	external	1.42022e-07	0.994936	1.66297	Inf	1.60485e-05	1	1.60485e-05
4051	GRMZM2G156861_P03,GRMZM2G156861_P01/Sobic.003G385500.1.p	26	2	27.6888	256	21	25	147	125	73	19	15	16	10	13	52	10	9	11	11	11	47	28	7	3	7	3	8	19	4	3	5	4	3	pacid=31034975	external	2.75978e-07	0.00470826	1.4112	0.508464	2.5921e-05	0.148969	2.5921e-05
77	GRMZM2G024315_P01/Sobic.003G222300.1.p	97	1	18.2081	94	6	6	98	33	20	3	4	5	4	4	13	2	2	4	3	2	88	46	10	11	11	7	7	42	9	11	6	9	7	pacid=30980313	external	2.9493e-07	0.109522	-1.41504	0.263034	2.5921e-05	0.465764	2.5921e-05
374	GRMZM2G144668_P01/Sobic.003G039700.1.p	82	1	22.8117	80	8	9	66	18	10	3	3	3	0	1	8	1	2	2	1	2	61	38	9	8	8	4	9	23	5	4	4	5	5	pacid=31033655	external	2.46168e-06	0.010236	-1.76081	0.630766	0.000162265	0.22318	0.000162265
483	GRMZM2G345493_P02/Sobic.010G188300.1.p	506	1	43.3702	2615	12	13	127	95	46	11	7	9	7	12	49	8	10	13	10	8	161	76	17	14	18	13	14	85	19	17	16	15	18	pacid=31041125	external	2.31505e-06	0.21804	-0.761061	-0.135352	0.000162265	0.577531	0.000162265
2961	GRMZM2G113349_P01/Sobic.010G241000.1.p	940	1	55.8824	1136	24	31	523	319	164	42	30	32	23	37	155	26	30	36	31	32	563	290	68	59	65	38	60	273	60	45	61	45	62	pacid=30987942	external	2.38765e-06	0.463869	-0.819578	0.0850815	0.000162265	0.80746	0.000162265
3671	GRMZM2G141473_P01/Sobic.001G062300.1.p	135	1	3.38733	1290	4	4	16	7	6	2	1	1	1	1	1	0	0	0	0	1	41	28	6	5	6	5	6	13	4	4	2	2	1	pacid=31017600	external	3.07413e-06	0.000392704	-2.5502	1.28011	0.000187049	0.0443756	0.000187049
530	GRMZM2G450233_P01/Sobic.009G055300.1.p	1329	1	27.933	1961	11	14	109	85	39	12	9	9	3	6	46	9	10	12	5	10	21	11	3	3	2	2	1	10	3	1	3	1	2	pacid=31026922	external	3.46728e-06	0.503097	2.01707	-0.163499	0.000195901	0.817146	0.000195901
518	GRMZM2G423137_P01/Sobic.004G020300.1.p	1851	1	9.65517	2895	3	3	21	21	12	2	2	2	3	3	9	2	2	2	1	2	51	28	5	8	6	5	4	23	6	3	6	3	5	pacid=31048147	external	4.85564e-06	0.0890436	-1.28011	0.321928	0.000256054	0.455942	0.000256054
313	GRMZM2G120517_P03,GRMZM2G120517_P02/Sobic.006G084400.1.p	176	2	14.4118	3110	4	5	30	9	8	1	2	2	0	3	1	0	1	0	0	0	62	34	7	7	7	6	7	28	7	3	6	5	7	pacid=30969128	external	6.30992e-06	0.0862458	-2.78427	0.534336	0.000311947	0.4504	0.000311947
2831	GRMZM2G107968_P01/Sobic.002G116900.1.p	487	1	11.5727	3059	4	4	28	11	5	1	1	1	0	2	6	1	2	1	1	1	37	20	5	5	4	4	2	17	3	3	3	5	3	pacid=30965536	external	6.88029e-06	0.609048	-1.75002	0.120294	0.000320136	0.855739	0.000320136
189	GRMZM2G074604_P01/Sobic.004G220300.1.p	305	1	34.375	2911	22	24	220	148	51	12	12	11	6	10	97	18	21	20	19	19	76	25	8	4	4	5	4	51	12	7	10	7	15	pacid=30985019	external	9.1889e-06	9.1889e-06	0.961526	-0.961526	0.000403801	0.00363421	0.000403801
3951	GRMZM2G152908_P01/Sobic.001G344500.2.p,Sobic.001G344500.1.p	185	1	36.2301	2009	25	30	206	143	37	9	6	9	4	9	106	18	29	21	19	19	65	11	2	4	2	0	3	54	12	12	10	9	11	pacid=31037587	external	1.08343e-05	1.51622e-07	1.1375	-1.73697	0.000451047	0.000119933	0.000119933
3511	GRMZM2G133919_P01/Sobic.004G356700.1.p	1337	1	20	1852	12	13	152	58	29	5	8	5	4	7	29	5	6	5	7	6	122	67	17	12	16	8	14	55	11	6	13	11	14	pacid=30986147	external	1.1687e-05	0.25806	-1.07276	0.192645	0.00046222	0.616692	0.00046222
1021	GRMZM2G035256_P01/Sobic.003G029200.1.p	887	1	5.31401	1630	2	2	25	17	9	2	2	2	1	2	8	1	2	2	1	2	37	23	4	4	5	4	6	14	4	2	3	2	3	pacid=31029170	external	1.44734e-05	0.00714917	-1.12199	0.540568	0.000545164	0.195	0.000545164
471	GRMZM2G319062_P01/Sobic.007G068500.1.p	705	1	8.04954	1563	3	3	10	8	8	2	2	1	0	3	0	0	0	0	0	0	51	40	9	8	10	5	8	11	4	1	2	1	3	pacid=31050177	external	1.56993e-05	4.91448e-05	-2.67243	2.12553	0.000564461	0.00971839	0.000564461
4101	GRMZM2G159016_P01/Sobic.009G247100.1.p	286	1	9.21844	311	4	4	25	10	6	1	2	2	0	1	4	1	1	1	0	1	79	30	11	5	6	2	6	49	13	4	12	8	12	pacid=31024899	external	1.75324e-05	0.104452	-2.98185	-0.557995	0.000602963	0.464327	0.000602963
2491	GRMZM2G098153_P01/Sobic.009G212300.1.p	442	1	14.5833	496	3	3	17	9	3	1	1	0	0	1	6	1	2	1	1	1	29	15	4	3	3	2	3	14	2	2	3	3	4	pacid=30979152	external	2.33936e-05	0.55092	-1.68806	-0.152003	0.000771015	0.839168	0.000771015
328	GRMZM2G126261_P01,GRMZM2G126261_P03/Sobic.002G416700.1.p,Sobic.002G416700.2.p	1586	2	18.9733	2329	3	4	32	32	18	4	3	4	3	4	14	3	2	4	2	3	6	5	1	2	0	1	1	1	0	0	1	0	0	pacid=30993384	external	2.61238e-05	0.0677946	2.41504	0.616671	0.000826558	0.415702	0.000826558
194	GRMZM2G095333_P01,Sobic.010G219500.2.p	1048	2	24.9541	1294	6	6	67	43	22	5	4	4	4	5	21	4	3	4	5	5	24	12	1	3	2	3	3	12	3	2	2	2	3	pacid=37911557 transcript=Sobic.010G219500.2 locus=Sobic.010G219500 ID=Sobic.010G219500.2.v3.2 annot-version=v3.1.1	internal	2.74369e-05	0.765654	0.841302	0.0430687	0.000834716	0.942238	0.000834716
1851	GRMZM2G074097_P01/Sobic.002G384400.1.p	270	1	39.6067	952	9	12	88	80	28	7	5	7	2	7	52	7	11	9	13	12	27	15	4	3	4	1	3	12	4	2	2	2	2	pacid=31034809	external	2.92134e-05	0.0322487	1.56704	-0.573735	0.000855846	0.307507	0.000855846
401	GRMZM2G155962_P03,GRMZM2G155962_P01/Sobic.006G054300.1.p	1270	2	10.3909	1706	2	2	11	11	6	2	1	2	0	1	5	0	1	2	1	1	38	23	5	5	5	3	5	15	4	1	3	4	3	pacid=31001070	external	3.29715e-05	0.0652047	-1.7885	0.536053	0.000931446	0.406117	0.000931446
3211	GRMZM2G123029_P05,GRMZM2G123029_P04,GRMZM2G123029_P03/Sobic.009G034700.5.p,Sobic.009G034700.4.p,Sobic.009G034700.6.p,Sobic.009G034700.3.p,Sobic.009G034700.1.p,Sobic.009G034700.2.p	410	3	7.7243	3139	3	3	10	1	1	1	0	0	0	0	0	0	0	0	0	0	42	27	6	5	5	5	6	15	3	2	4	3	3	pacid=31002525	external	3.69369e-05	0.00957932	-5.39232	0.900464	0.000974658	0.22318	0.000974658
2421	GRMZM2G094978_P01/Sobic.005G123200.2.p	429	1	21.8241	866	6	7	62	56	26	8	5	4	2	7	30	6	8	6	5	5	14	4	1	0	2	0	1	10	1	2	3	3	1	pacid=30966013	external	3.69655e-05	0.17399	2	-0.415037	0.000974658	0.543976	0.000974658
51	GRMZM2G019958_P03,GRMZM2G019958_P01,Sobic.001G104700.1.p	650	3	18.344	736	4	4	36	33	18	4	3	4	2	5	15	2	3	3	4	3	3	2	1	0	1	0	0	1	0	0	1	0	0	pacid=37938448 transcript=Sobic.001G104700.1 locus=Sobic.001G104700 ID=Sobic.001G104700.1.v3.2 annot-version=v3.1.1	internal	3.84835e-05	0.369766	3.45943	0.321928	0.000981949	0.720407	0.000981949
2291	GRMZM2G089944_P01/Sobic.003G306600.1.p	1105	1	10.262	1396	4	4	31	7	4	2	0	1	0	1	3	0	1	1	1	0	42	23	7	4	7	2	3	19	4	4	5	3	3	pacid=31030950	external	4.00558e-05	0.385107	-2.58496	0.295456	0.000990129	0.730493	0.000990129
419	GRMZM2G162529_P01/Sobic.004G272100.1.p	124	1	49.2611	278	14	22	297	173	69	19	9	14	10	17	104	20	27	21	19	17	304	150	37	26	32	20	35	154	29	27	35	34	29	pacid=30991072	external	4.43694e-05	0.119714	-0.813299	-0.23644	0.00106352	0.477515	0.00106352
318	AC202185.4_FGP004/Sobic.001G264300.1.p	221	1	29.1866	1251	8	10	47	47	19	6	2	3	4	4	28	4	6	6	8	4	13	7	1	1	3	1	1	6	2	0	1	1	2	pacid=31015091	external	4.63996e-05	0.191709	1.85415	-0.387023	0.00107947	0.563725	0.00107947
465	GRMZM2G305851_P01/Sobic.009G124000.1.p	1213	1	29.3814	1896	10	10	168	73	32	8	6	6	6	6	41	9	12	7	8	5	119	59	13	11	14	9	12	60	13	10	12	13	12	pacid=31026265	external	4.97202e-05	0.253847	-0.704993	-0.150417	0.00112368	0.612419	0.00112368
1281	GRMZM2G048324_P01/Sobic.001G342600.1.p	1614	1	12.1053	2378	5	7	49	17	12	4	1	3	0	4	5	0	2	1	2	0	59	35	8	7	6	6	8	24	5	3	6	4	6	pacid=31009679	external	5.28672e-05	0.0269652	-1.79518	0.696608	0.00115013	0.290827	0.00115013
39	GRMZM2G012631_P01,Sobic.007G216300.1.p	485	2	26.8764	810	18	23	143	123	54	20	10	13	10	1	69	11	20	13	15	10	20	8	1	0	0	3	4	12	4	3	2	0	3	pacid=37937157 transcript=Sobic.007G216300.1 locus=Sobic.007G216300 ID=Sobic.007G216300.1.v3.2 annot-version=v3.1.1	internal	5.37988e-05	0.276851	2.62059	-0.385654	0.00115013	0.644087	0.00115013
2851	GRMZM2G109130_P01/Sobic.001G125900.1.p	26	1	13.2948	24	10	12	67	29	20	7	4	2	3	4	9	2	2	1	2	2	104	55	18	9	15	4	9	49	13	5	9	9	13	pacid=31006372	external	5.79072e-05	0.216747	-1.84246	0.370838	0.00120538	0.577531	0.00120538
416	GRMZM2G162200_P02,GRMZM2G162200_P01/Sobic.005G231500.1.p	769	2	43.318	899	17	36	306	242	90	29	14	18	7	22	152	25	29	34	34	30	121	50	12	11	13	5	9	71	14	10	17	13	17	pacid=31048926	external	6.37904e-05	0.0019904	1	-0.671617	0.00121854	0.115943	0.00121854
3510	GRMZM2G010349_P02/Sobic.009G219100.1.p	1360	1	15.2753	1888	7	9	86	51	23	6	5	6	4	2	28	6	5	6	6	5	83	36	8	6	8	5	9	47	9	9	9	9	11	pacid=31026872	external	6.09193e-05	0.0164552	-0.702614	-0.346176	0.00121854	0.25924	0.00121854
3351	GRMZM2G128171_P03,GRMZM2G128171_P02/Sobic.003G156400.1.p	1091	2	26.8657	1375	7	7	42	20	12	5	2	2	1	2	8	1	1	2	2	2	50	27	7	5	6	3	6	23	5	4	6	4	4	pacid=31036493	external	6.4701e-05	0.166011	-1.32193	0.331206	0.00121854	0.531637	0.00121854
3161	GRMZM2G121494_P02/Sobic.007G161500.1.p	784	1	19.5312	917	2	2	15	9	5	1	0	2	1	1	4	1	1	0	1	1	25	12	2	2	3	3	2	13	2	3	3	2	3	pacid=31051617	external	6.20692e-05	1	-1.47393	0	0.00121854	1	0.00121854
3581	GRMZM2G138258_P01/Sobic.003G431900.1.p	1213	1	35.5769	1592	15	22	260	213	91	22	18	22	12	17	122	26	32	21	24	19	120	59	12	12	11	11	13	61	12	5	18	11	15	pacid=31029401	external	9.25553e-05	0.0856691	0.827819	-0.286881	0.00170259	0.4504	0.00170259
7	AC214350.3_FGP007/Sobic.004G159000.1.p,Sobic.004G159000.2.p	236	1	21.6117	2914	4	4	54	31	16	4	3	3	2	4	15	2	4	4	2	3	15	9	2	2	2	1	2	6	2	1	1	1	1	pacid=30991542	external	0.000106932	0.218083	1.04731	0.251539	0.00192235	0.577531	0.00192235
456	GRMZM2G179981_P01/Sobic.004G130800.2.p	2034	1	20.1201	3332	6	6	28	28	17	3	3	4	3	4	11	3	2	3	0	3	10	5	2	1	1	0	1	5	1	1	1	1	1	pacid=30988404	external	0.000111381	0.101518	1.48543	0.459432	0.00195782	0.464327	0.00195782
60	GRMZM2G025014_P04,GRMZM2G025014_P03,GRMZM2G025014_P02,GRMZM2G025014_P01,GRMZM2G031827_P06,GRMZM2G031827_P05,GRMZM2G031827_P04,GRMZM2G031827_P02,GRMZM2G031827_P01,GRMZM2G177229_P08,GRMZM2G177229_P07,GRMZM2G177229_P06,GRMZM2G177229_P05,GRMZM2G177229_P04,GRMZM2G177229_P03,GRMZM2G177229_P02,GRMZM2G177229_P01,GRMZM2G020928_P03,GRMZM2G020928_P02,GRMZM2G020928_P01,Sobic.003G250500.2.p,Sobic.003G250500.3…	1839	31	4.73233	2866	2	2	27	6	3	0	1	1	0	1	3	1	0	0	1	1	21	12	2	3	3	2	2	9	2	2	1	2	2	pacid=37950141 transcript=Sobic.002G249500.5 locus=Sobic.002G249500 ID=Sobic.002G249500.5.v3.2 annot-version=v3.1.1	internal	0.000122663	0.307072	-1.80735	0.321928	0.00206439	0.660038	0.00206439
485	GRMZM2G348512_P06,GRMZM2G348512_P05,GRMZM2G348512_P03/Sobic.003G234400.4.p	351	3	73.913	2176	15	20	262	121	62	12	12	17	8	13	59	8	19	10	10	12	228	120	35	22	25	17	21	108	26	17	27	16	22	pacid=31035820	external	0.000120939	0.489881	-0.914027	0.12409	0.00206439	0.81236	0.00206439
3631	GRMZM2G139803_P01/Sobic.004G227200.1.p	1783	1	18.3544	2734	2	3	51	29	14	4	2	2	2	4	15	3	4	2	2	4	53	25	4	5	5	5	6	28	7	4	7	5	5	pacid=30984759	external	0.000125445	0.415427	-0.869939	-0.140863	0.00206722	0.759956	0.00206722
871	GRMZM2G027875_P01/Sobic.004G092900.1.p	699	1	22.1177	806	15	17	120	75	46	15	7	9	4	11	29	6	7	6	7	3	144	74	16	13	17	12	16	70	15	10	15	14	16	pacid=30983262	external	0.000133065	0.147432	-0.941106	0.277534	0.00210509	0.509253	0.00210509
355	GRMZM2G365374_P01,Sobic.002G249800.1.p	127	2	8.96404	122	4	7	43	9	5	2	1	1	0	1	4	0	1	1	1	1	34	20	4	8	3	2	3	14	3	2	3	3	3	pacid=37951057 transcript=Sobic.002G249800.1 locus=Sobic.002G249800 ID=Sobic.002G249800.1.v3.2 annot-version=v3.1.1	internal	0.000131176	0.159055	-1.91754	0.473931	0.00210509	0.519885	0.00210509
2981	GRMZM2G115049_P01/Sobic.009G212400.1.p	276	1	41.8773	1284	9	10	98	48	26	8	5	6	3	4	22	4	5	4	5	4	88	45	11	8	12	5	9	43	11	9	8	6	9	pacid=31025662	external	0.000142508	0.468083	-0.874469	0.127379	0.00221027	0.807875	0.00221027
522	GRMZM2G432801_P01/Sobic.009G203500.1.p	9	1	18.7008	8	7	7	56	9	9	1	2	3	0	3	0	0	0	0	0	0	52	28	7	6	7	2	6	24	4	6	6	4	4	pacid=31025767	external	0.000146459	0.116742	-2.53051	0.624491	0.00222786	0.473278	0.00222786
136	GRMZM2G052812_P02/Sobic.010G019800.1.p,Sobic.010G019900.1.p	1208	1	27.4566	1583	8	8	78	30	16	4	4	3	1	4	14	2	2	4	4	2	59	37	7	6	9	6	9	22	4	4	6	4	4	pacid=31023668	external	0.000151564	0.0104602	-0.975752	0.557995	0.00226202	0.22318	0.00226202
3971	GRMZM2G153815_P01/Sobic.001G193500.1.p	127	1	20.4713	343	10	11	88	43	25	5	5	4	5	6	18	2	4	4	5	3	77	49	10	14	8	7	10	28	6	4	5	5	8	pacid=30990491	external	0.000165394	0.000978759	-0.840522	0.685891	0.00242272	0.0703817	0.00242272
574	GRMZM5G870446_P02/Sobic.006G102000.1.p	1772	1	20	2706	5	6	80	53	29	7	5	6	4	7	24	4	4	5	6	5	80	47	11	9	12	7	8	33	7	6	7	7	6	pacid=31003342	external	0.000171	0.0035447	-0.594008	0.415037	0.00245929	0.127448	0.00245929
453	GRMZM2G178645_P01/Sobic.001G361900.1.p	350	1	7.01754	3026	3	3	16	5	1	0	0	0	1	0	4	1	1	1	1	0	25	12	2	2	3	1	4	13	2	3	4	2	2	pacid=31040129	external	0.000183826	0.306778	-2.32193	-0.387023	0.00255168	0.660038	0.00255168
429	GRMZM2G168143_P01/Sobic.010G005500.1.p	673	1	48.8764	2945	19	32	306	154	74	23	14	15	6	16	80	16	20	14	13	17	253	121	30	23	24	16	28	132	28	23	29	24	28	pacid=31039045	external	0.000183876	0.42106	-0.716207	-0.12059	0.00255168	0.765651	0.00255168
4810	GRMZM2G015132_P01/Sobic.004G093600.1.p	953	1	16.7587	2236	7	7	111	56	28	8	5	8	3	4	28	5	7	6	4	6	106	60	14	12	15	8	11	46	11	4	10	11	10	pacid=30990567	external	0.000194135	0.19634	-0.920566	0.249978	0.00260262	0.566807	0.00260262
138	GRMZM2G061745_P01,GRMZM2G061745_P03,GRMZM2G061745_P04,GRMZM2G061745_P02,Sobic.006G252200.1.p	340	5	24.1797	371	6	6	35	10	4	1	1	0	1	1	6	1	1	1	2	1	25	14	3	2	4	2	3	11	3	3	2	1	2	pacid=37946502 transcript=Sobic.006G252200.1 locus=Sobic.006G252200 ID=Sobic.006G252200.1.v3.2 annot-version=v3.1.1	internal	0.000197417	0.748565	-1.32193	0.0824622	0.00260262	0.939356	0.00260262
315	GRMZM2G120652_P01/Sobic.002G005600.1.p	1207	1	14.7343	1581	5	7	37	15	5	1	1	1	1	1	10	1	3	2	2	2	38	22	3	6	3	6	4	16	4	2	4	3	3	pacid=30997292	external	0.000196455	0.834013	-1.34104	0.0544478	0.00260262	0.957904	0.00260262
141	GRMZM2G063363_P01,GRMZM2G145951_P01,GRMZM2G145951_P02,Sobic.007G035600.1.p	1823	4	21.6484	2828	5	5	35	2	1	0	0	0	1	0	1	0	0	0	1	0	33	20	5	4	5	3	3	13	2	3	4	1	3	pacid=37934385 transcript=Sobic.007G035600.1 locus=Sobic.007G035600 ID=Sobic.007G035600.1.v3.2 annot-version=v3.1.1	internal	0.000205912	0.169444	-4.04439	0.584963	0.0026701	0.536121	0.0026701
1881	GRMZM2G074331_P01,GRMZM2G137980_P01,AC206788.3_FGP015,AC184831.3_FGP003/Sobic.009G205700.1.p	1789	4	8.28846	2748	2	2	13	5	1	1	0	0	0	0	4	1	0	2	1	0	44	32	7	7	6	5	7	12	2	3	3	2	2	pacid=31052568	external	0.000209677	0.0270281	-3.1375	1.04439	0.00267507	0.290827	0.00267507
86	GRMZM2G027219_P01/Sobic.006G049200.1.p	731	1	12.528	850	5	5	23	11	4	1	0	1	0	2	7	1	2	2	1	1	30	17	3	3	4	3	4	13	4	2	2	3	2	pacid=30970419	external	0.000237382	0.80238	-1.44746	0.0703893	0.00298047	0.949546	0.00298047
4	AC207628.4_FGP005,Sobic.003G276500.1.p	276	2	8.63309	296	2	2	31	7	3	1	1	1	0	0	4	1	1	1	0	1	24	11	3	2	3	0	3	13	3	3	3	2	2	pacid=37917322 transcript=Sobic.003G276500.1 locus=Sobic.003G276500 ID=Sobic.003G276500.1.v3.2 annot-version=v3.1.1	internal	0.000244281	0.398257	-1.77761	-0.280108	0.00301915	0.742975	0.00301915
2411	GRMZM2G094742_P03,GRMZM2G094742_P02/Sobic.008G179500.1.p	1771	2	36.3922	2807	2	2	24	11	6	1	1	2	0	2	5	0	1	1	2	1	29	15	3	3	4	3	2	14	2	3	4	3	2	pacid=31013230	external	0.000258332	0.602662	-1.39855	0.14439	0.00314371	0.855739	0.00314371
1	AC196475.3_FGP004/Sobic.007G047300.1.p	374	1	47.3973	754	13	19	107	91	31	10	5	5	3	8	60	9	18	12	12	9	36	18	4	3	3	3	5	18	5	0	4	3	6	pacid=31051422	external	0.000262492	0.0237364	1.33787	-0.670692	0.00314592	0.290827	0.00314592
2301	GRMZM2G090271_P01/Sobic.006G197700.1.p,Sobic.006G197700.3.p,Sobic.006G197700.2.p	1437	1	34.4322	2059	6	6	24	24	12	4	2	2	3	1	12	1	2	3	3	3	4	0	0	0	0	0	0	4	1	1	1	0	1	pacid=30966312	external	0.000269664	0.313557	2.58496	-0.415037	0.00318364	0.671309	0.00318364
13	GRMZM2G002416_P01/Sobic.003G143700.1.p,Sobic.003G143700.2.p	666	1	14	991	4	5	20	15	6	2	0	2	0	2	9	2	2	1	1	3	51	30	8	8	6	3	5	21	7	2	4	2	6	pacid=30979282	external	0.000294571	0.433435	-1.76553	0.263034	0.00337821	0.773921	0.00337821
3141	GRMZM2G120579_P01/Sobic.001G252000.1.p	123	1	15.4676	119	4	5	40	40	19	5	4	5	1	4	21	3	4	6	4	4	13	8	1	2	2	1	2	5	3	0	1	0	1	pacid=30992681	external	0.000294686	0.861733	1.62149	0.0544478	0.00337821	0.962755	0.00337821
1701	GRMZM2G069708_P01/Sobic.006G063900.1.p	23	1	23.4528	20	5	5	53	24	14	5	3	2	1	3	10	2	4	1	2	1	56	28	6	6	7	2	7	28	6	6	7	4	5	pacid=30970732	external	0.000374586	0.576822	-1.22239	0.14439	0.00423282	0.855261	0.00423282
2321	GRMZM2G090542_P01/Sobic.007G120800.1.p	383	1	10.2623	428	7	7	30	7	3	0	1	1	0	1	4	1	2	0	1	0	28	11	3	1	2	2	3	17	2	3	5	2	5	pacid=31012261	external	0.000399811	0.134259	-2	-0.584963	0.00445424	0.493948	0.00445424
200	GRMZM2G080107_P01/Sobic.008G063500.1.p	551	1	25.3425	1810	7	7	51	44	22	4	4	6	3	5	22	5	4	5	4	4	92	34	7	7	9	7	4	58	18	6	11	8	15	pacid=31031866	external	0.000418841	0.0401347	-1.06413	-0.514573	0.00460143	0.308858	0.00460143
234	GRMZM2G118005_P01,Sobic.001G017000.1.p	1288	2	16.8608	1747	3	4	52	35	20	4	3	4	4	5	15	2	3	3	4	3	17	7	2	2	1	0	2	10	3	1	2	2	2	pacid=37942444 transcript=Sobic.001G017000.1 locus=Sobic.001G017000 ID=Sobic.001G017000.1.v3.2 annot-version=v3.1.1	internal	0.000431191	0.627416	1.04182	0.111031	0.00467222	0.870829	0.00467222
2641	GRMZM2G101875_P02,GRMZM2G101875_P01/Sobic.009G031400.1.p	1085	2	6.25931	1847	4	4	28	28	10	3	2	4	0	1	18	4	3	4	4	3	3	1	1	0	0	0	0	2	0	1	1	0	0	pacid=31003583	external	0.000449711	0.0776815	3.22239	-0.862496	0.00474295	0.439866	0.00474295
579	GRMZM5G885392_P01/Sobic.002G112400.1.p,Sobic.002G112400.4.p,Sobic.002G112400.2.p,Sobic.002G112400.5.p	1841	1	6.66667	2870	2	2	19	19	11	2	2	2	2	3	8	1	1	2	2	2	6	2	1	0	1	0	0	4	1	1	1	1	0	pacid=30993734	external	0.000448242	0.728966	1.66297	0.115477	0.00474295	0.928522	0.00474295
122	GRMZM2G054465_P01,Sobic.010G198000.1.p,Sobic.010G198000.3.p,Sobic.010G198000.2.p	1959	4	8.72471	3159	3	3	23	3	3	1	1	0	0	1	0	0	0	0	0	0	20	13	5	2	2	1	3	7	2	1	1	1	2	pacid=37909076 transcript=Sobic.010G198000.2 locus=Sobic.010G198000 ID=Sobic.010G198000.2.v3.2 annot-version=v3.1.1	internal	0.000496525	0.0205607	-2.73697	1.19265	0.00508519	0.28537	0.00508519
1241	GRMZM2G046804_P07,GRMZM2G046804_P04,GRMZM2G046804_P02,GRMZM2G046804_P01,GRMZM2G046804_P08,GRMZM2G046804_P06,GRMZM2G046804_P05/Sobic.010G262500.1.p	697	7	31.604	1019	9	16	106	79	46	11	7	9	6	13	33	8	10	5	6	4	136	68	14	15	15	7	17	68	13	13	12	13	17	pacid=31050746	external	0.000507876	0.337363	-0.783682	0.174679	0.00508519	0.694932	0.00508519
371	GRMZM2G143651_P01/Sobic.004G344800.1.p	1559	1	19.7397	2282	8	8	75	55	31	8	7	7	4	5	24	5	5	4	5	5	32	15	3	3	5	1	3	17	4	4	3	3	3	pacid=30987859	external	0.000505171	0.359607	0.78136	0.16601	0.00508519	0.715436	0.00508519
397	GRMZM5G816772_P01,GRMZM2G371620_P01,Sobic.K031400.1.p	880	3	14.8712	1053	3	3	30	25	11	4	2	1	1	3	14	3	4	3	1	3	5	3	0	1	1	1	0	2	0	0	0	1	1	pacid=37922738 transcript=Sobic.K031400.1 locus=Sobic.K031400 ID=Sobic.K031400.1.v3.2 annot-version=v3.1.1	internal	0.000494339	0.63972	2.32193	-0.192645	0.00508519	0.875528	0.00508519
553	GRMZM5G818058_P02/Sobic.002G297300.1.p	698	1	15.5779	805	3	4	42	12	5	1	1	1	1	1	7	0	1	3	1	2	32	16	4	3	4	2	3	16	5	3	1	3	4	pacid=30996133	external	0.000550509	0.664649	-1.41504	-0.131245	0.00544316	0.897163	0.00544316
210	GRMZM2G104649_P03,GRMZM2G104649_P04,Sobic.006G044600.2.p	671	3	14.6997	770	4	4	52	16	9	2	2	2	0	3	7	1	1	3	1	1	36	17	4	3	5	3	2	19	4	4	3	4	4	pacid=37948850 transcript=Sobic.006G044600.2 locus=Sobic.006G044600 ID=Sobic.006G044600.2.v3.2 annot-version=v3.1.1	internal	0.000604653	1	-1.16993	0	0.0059047	1	0.0059047
3910	GRMZM2G011129_P01/Sobic.002G131700.1.p	789	1	17.4342	1849	4	5	28	28	8	3	3	1	1	0	20	5	5	4	5	1	2	0	0	0	0	0	0	2	1	0	1	0	0	pacid=30997113	external	0.000620204	0.0112034	3.80735	-1.45943	0.0059827	0.227227	0.0059827
681	GRMZM2G021256_P01/Sobic.004G191200.1.p	440	1	34.1014	2429	6	6	33	20	5	1	1	1	1	1	15	4	2	3	2	4	41	15	4	3	4	2	2	26	7	3	7	3	6	pacid=31052324	external	0.000672474	0.000672474	-1.03562	-1.03562	0.00640876	0.059103	0.00640876
3791	GRMZM2G145895_P01/Sobic.002G098800.1.p,Sobic.002G098800.2.p	674	1	20.9876	771	4	4	26	26	11	1	2	3	2	3	15	1	4	3	4	3	6	3	0	1	0	1	1	3	2	0	0	0	1	pacid=30974594	external	0.000693474	0.380404	2.11548	-0.36257	0.00653022	0.72681	0.00653022
2661	GRMZM2G102829_P01,GRMZM2G102829_P02/Sobic.002G150700.1.p,Sobic.002G150700.2.p	198	2	18.4053	2277	9	10	95	55	24	6	5	5	2	6	31	4	10	8	6	3	102	48	13	7	11	5	12	54	10	10	13	9	12	pacid=30973309	external	0.000759978	0.266647	-0.891066	-0.239466	0.00707227	0.629606	0.00707227
519	GRMZM2G424857_P01/Sobic.003G306700.1.p	1105	1	8.13187	3178	3	3	21	7	5	2	0	1	0	2	2	0	1	0	0	1	24	13	3	3	3	2	2	11	2	3	2	2	2	pacid=30977992	external	0.00080184	0.22199	-1.77761	0.469485	0.00720745	0.581436	0.00720745
125	GRMZM2G047042_P03,GRMZM2G047042_P01,GRMZM2G047042_P02/Sobic.008G078400.1.p	259	3	28.0432	307	7	7	26	3	1	1	0	0	0	0	2	0	2	0	0	0	53	22	7	4	6	0	5	31	6	3	9	4	9	pacid=31033281	external	0.000794451	0.279003	-4.14296	-0.520832	0.00720745	0.647189	0.00720745
1651	GRMZM2G068244_P01/Sobic.001G033100.1.p	332	1	34.1085	718	7	8	55	45	24	5	4	4	3	8	21	5	4	2	3	7	13	7	2	0	3	1	1	6	2	0	3	1	0	pacid=31015990	external	0.00079911	0.595216	1.79141	0.199309	0.00720745	0.855739	0.00720745
127	GRMZM2G056870_P01,AC149475.2_FGP003,Sobic.005G188100.1.p,Sobic.001G502200.1.p	1965	4	17.2269	3174	4	4	85	29	16	5	1	3	2	5	13	1	4	2	3	3	56	32	6	8	6	6	6	24	7	6	4	3	4	pacid=37941590 transcript=Sobic.001G502200.1 locus=Sobic.001G502200 ID=Sobic.001G502200.1.v3.2 annot-version=v3.1.1	internal	0.000894867	0.114984	-0.949374	0.375509	0.0078637	0.473278	0.0078637
2171	GRMZM2G087041_P01/Sobic.002G152700.1.p	255	1	34.5833	880	7	7	37	33	16	3	3	3	2	5	17	2	4	4	2	5	14	5	1	1	2	0	1	9	2	1	3	1	2	pacid=30997258	external	0.000914615	0.293149	1.23704	-0.308122	0.0078637	0.656302	0.0078637
541	GRMZM2G488458_P01/Sobic.002G306201.1.p	675	1	32.8	772	6	7	45	43	22	6	4	6	3	3	21	3	4	5	5	4	23	12	2	1	3	2	4	11	1	2	2	3	3	pacid=30993214	external	0.000908451	0.68876	0.902703	0.0874628	0.0078637	0.909531	0.0078637
167	GRMZM2G068506_P02,GRMZM2G068506_P01,GRMZM2G068506_P03/Sobic.007G101500.1.p,Sobic.007G101500.2.p,Sobic.007G101500.3.p	547	3	27.2056	2326	11	17	132	67	30	9	7	7	2	5	37	8	7	8	7	7	117	63	17	11	18	6	11	54	10	11	11	11	11	pacid=31050157	external	0.000909279	0.872873	-0.804276	0.0313642	0.0078637	0.968094	0.0078637
251	GRMZM2G098290_P02,GRMZM2G098290_P01,GRMZM2G098290_P03/Sobic.006G249400.1.p	1	3	34.261	40	9	11	100	71	26	7	6	4	2	7	45	10	9	8	8	10	35	16	4	4	2	1	5	19	7	2	4	2	4	pacid=31002098	external	0.000935332	0.0241573	1.02046	-0.607683	0.00795176	0.290827	0.00795176
225	GRMZM2G113720_P01,GRMZM2G022619_P01,Sobic.009G233400.1.p	543	3	39.1061	1603	8	9	50	10	5	2	1	0	1	1	5	2	1	0	0	2	40	14	6	2	4	0	2	26	6	5	8	3	4	pacid=37921081 transcript=Sobic.009G233400.1 locus=Sobic.009G233400 ID=Sobic.009G233400.1.v3.2 annot-version=v3.1.1	internal	0.000955015	0.105789	-2	-0.706269	0.00795176	0.464327	0.00795176
265	GRMZM2G102596_P01,GRMZM2G102596_P02/Sobic.010G042800.1.p	1446	2	22.4071	2075	6	6	62	26	14	3	3	4	1	3	12	3	3	2	2	2	47	23	6	4	6	2	5	24	5	6	3	6	4	pacid=31037799	external	0.000949209	0.849445	-0.854149	0.0395284	0.00795176	0.962435	0.00795176
434	GRMZM2G169405_P01/Sobic.003G365200.1.p	1896	1	13.6364	3004	2	2	10	3	1	0	0	1	0	0	2	0	1	0	0	1	17	9	2	2	2	2	1	8	2	1	2	1	2	pacid=30976183	external	0.000968822	1	-2.5025	0	0.00798269	1	0.00798269
831	GRMZM2G025992_P01,GRMZM2G025992_P05,GRMZM2G025992_P04,GRMZM2G025992_P03/Sobic.002G407900.1.p,Sobic.002G407900.3.p,Sobic.002G407900.2.p	1830	4	18.969	3328	2	3	14	4	4	1	1	1	1	0	0	0	0	0	0	0	15	9	3	1	2	2	1	6	1	2	1	1	1	pacid=30993184	external	0.00103145	0.01737	-1.90689	1.11548	0.00832527	0.25924	0.00832527
171	GRMZM2G081622_P01,Sobic.001G467000.1.p	1280	2	17.8378	1734	2	2	26	5	4	0	1	2	1	0	1	0	0	1	0	0	21	10	2	2	2	2	2	11	2	2	2	2	3	pacid=37940326 transcript=Sobic.001G467000.1 locus=Sobic.001G467000 ID=Sobic.001G467000.1.v3.2 annot-version=v3.1.1	internal	0.00102744	0.598198	-2.07039	0.222392	0.00832527	0.855739	0.00832527
3051	GRMZM2G117968_P01/Sobic.002G341500.1.p	1261	1	19.0909	1688	7	8	81	55	26	7	6	4	3	6	29	5	5	7	5	7	34	20	5	4	4	3	4	14	3	3	4	2	2	pacid=30971893	external	0.00107628	0.578175	0.693897	0.0972972	0.00859935	0.855261	0.00859935
266	GRMZM2G136106_P01,Sobic.003G148400.1.p	494	2	6.13577	553	3	3	35	10	4	1	1	1	0	1	6	1	1	0	3	1	25	10	3	2	2	1	2	15	4	3	3	3	2	pacid=37917105 transcript=Sobic.003G148400.1 locus=Sobic.003G148400 ID=Sobic.003G148400.1.v3.2 annot-version=v3.1.1	internal	0.0011256	0.0778524	-1.32193	-0.584963	0.00890352	0.439866	0.00890352
2310	GRMZM2G005771_P02,GRMZM2G005771_P01/Sobic.010G277100.1.p,Sobic.009G193850.1.p	436	2	26.0355	489	4	4	58	23	12	5	2	1	2	2	11	1	1	3	3	3	48	23	7	4	5	4	3	25	4	4	5	5	7	pacid=30992030	external	0.00115055	0.875112	-1.0614	-0.040642	0.00897488	0.968094	0.00897488
1971	GRMZM2G078118_P02/Sobic.004G343300.1.p	1276	1	11.6883	1722	3	4	34	34	17	3	3	3	1	7	17	2	4	4	2	5	12	6	0	1	2	2	1	6	1	1	2	1	1	pacid=30983559	external	0.00115732	1	1.5025	0	0.00897488	1	0.00897488
1571	GRMZM2G060659_P02,GRMZM2G060659_P01/Sobic.010G276700.1.p,Sobic.010G276700.3.p,Sobic.010G276700.2.p	185	2	22.7939	3008	17	18	130	90	31	9	6	6	3	7	59	10	13	12	14	10	43	21	6	1	8	2	4	22	4	6	6	3	3	pacid=30989261	external	0.00119051	0.0263681	1.06559	-0.63941	0.00914263	0.290827	0.00914263
563	GRMZM2G017077_P01/Sobic.003G387100.1.p	56	1	29.9685	56	6	6	38	20	8	2	2	2	0	2	12	1	2	3	2	4	40	21	5	4	4	5	3	19	5	2	3	4	5	pacid=31030569	external	0.00130403	0.699973	-1	-0.0962153	0.00991812	0.918622	0.00991812
1271	GRMZM2G047954_P01/Sobic.002G030200.1.p	868	1	45.3947	1033	14	21	316	188	98	21	18	17	21	21	90	12	19	21	20	18	252	131	30	31	31	18	21	121	26	21	23	23	28	pacid=30997266	external	0.00134836	0.295229	-0.422691	0.118105	0.0101577	0.656302	0.0101577
2241	GRMZM2G088396_P01/Sobic.004G053700.1.p	102	1	14.1573	100	5	5	28	24	16	5	3	2	2	4	8	2	1	2	1	2	7	5	1	0	2	0	2	2	0	0	0	1	1	pacid=30992966	external	0.00149961	0.02098	1.77761	1.07039	0.0109269	0.28537	0.0109269
1441	GRMZM2G055684_P01,GRMZM2G055684_P02/Sobic.009G151000.1.p	1464	2	13.1453	2115	5	5	28	28	7	4	1	1	0	1	21	2	3	7	4	5	61	29	7	6	6	4	6	32	7	5	7	6	7	pacid=30975960	external	0.00154649	0.0645954	-1.12338	-0.557995	0.0109269	0.406117	0.0109269
379	GRMZM2G442804_P03,Sobic.010G207100.1.p	363	2	11.5497	3210	3	3	21	2	2	1	0	1	0	0	0	0	0	0	0	0	19	12	5	1	3	1	2	7	1	1	2	2	1	pacid=37909423 transcript=Sobic.010G207100.1 locus=Sobic.010G207100 ID=Sobic.010G207100.1.v3.2 annot-version=v3.1.1	internal	0.00152936	0.0797311	-3.24793	1	0.0109269	0.44012	0.0109269
556	GRMZM5G825759_P01/Sobic.001G417200.1.p	1352	1	29.9539	1880	7	9	71	29	15	2	2	2	4	5	14	3	4	4	1	2	58	22	5	4	4	4	5	36	10	5	10	5	6	pacid=31039891	external	0.00149423	0.103193	-1	-0.434403	0.0109269	0.464327	0.0109269
3751	GRMZM2G145449_P01/Sobic.003G124300.2.p	988	1	15.4639	1214	2	3	25	13	8	2	2	0	1	3	5	0	1	1	2	1	35	19	6	3	6	1	3	16	3	2	3	4	4	pacid=31030925	external	0.00157481	0.302253	-1.42884	0.36257	0.0109269	0.659056	0.0109269
573	GRMZM5G866223_P01/Sobic.001G230050.1.p	141	1	35.9116	1979	5	8	50	40	17	6	3	4	0	4	23	6	4	7	3	3	13	7	1	3	1	1	1	6	3	0	1	1	1	pacid=30964417	external	0.00156668	0.474086	1.62149	-0.273018	0.0109269	0.807875	0.0109269
264	GRMZM2G134367_P01,Sobic.001G461000.1.p	1933	2	5.61054	3103	2	2	21	3	2	0	1	0	0	1	1	0	0	1	0	0	18	9	3	1	1	1	3	9	1	2	2	2	2	pacid=37939371 transcript=Sobic.001G461000.1 locus=Sobic.001G461000 ID=Sobic.001G461000.1.v3.2 annot-version=v3.1.1	internal	0.00155414	0.778634	-2.58496	0.137504	0.0109269	0.947516	0.0109269
90	GRMZM2G042604_P01,GRMZM2G138128_P03,GRMZM2G138128_P02,GRMZM2G138128_P01,Sobic.002G279000.1.p	1316	5	14.4	1805	3	4	33	7	4	1	1	0	1	1	3	2	1	0	0	0	26	13	5	2	3	2	1	13	4	3	1	3	2	pacid=37952226 transcript=Sobic.002G279000.1 locus=Sobic.002G279000 ID=Sobic.002G279000.1.v3.2 annot-version=v3.1.1	internal	0.00156862	0.834447	-1.89308	0.0874628	0.0109269	0.957904	0.0109269
111	GRMZM2G050467_P01,Sobic.007G177200.1.p	1316	2	14.4	2707	3	4	32	5	2	0	0	0	1	1	3	2	1	0	0	0	27	14	5	2	3	3	1	13	4	3	1	3	2	pacid=37935032 transcript=Sobic.007G177200.1 locus=Sobic.007G177200 ID=Sobic.007G177200.1.v3.2 annot-version=v3.1.1	internal	0.00147179	1	-2.43296	0	0.0109269	1	0.0109269
61	GRMZM2G025366_P01,GRMZM2G025366_P02,Sobic.006G120900.1.p,Sobic.006G120900.2.p	638	4	12.0004	722	3	4	36	10	6	2	1	2	0	1	4	1	1	1	1	0	26	15	4	2	3	1	5	11	3	1	2	2	3	pacid=37948615 transcript=Sobic.006G120900.2 locus=Sobic.006G120900 ID=Sobic.006G120900.2.v3.2 annot-version=v3.1.1	internal	0.00158967	0.164137	-1.37851	0.485427	0.0109341	0.529927	0.0109341
4041	GRMZM2G156713_P01/Sobic.003G085000.1.p	848	1	13.0705	1009	5	5	52	43	24	5	5	4	4	6	19	4	1	5	4	5	21	9	4	2	1	0	2	12	2	2	2	3	3	pacid=30977750	external	0.00164359	0.732919	1.03395	0.0901978	0.0112076	0.929047	0.0112076
89	GRMZM2G042034_P03,GRMZM2G042034_P01,GRMZM5G878308_P03,GRMZM5G878308_P01,GRMZM2G069061_P01,Sobic.003G279200.1.p	1788	6	9.61964	2745	2	2	19	3	0	0	0	0	0	0	3	1	1	0	1	0	16	8	2	2	2	1	1	8	0	2	2	2	2	pacid=37918110 transcript=Sobic.003G279200.1 locus=Sobic.003G279200 ID=Sobic.003G279200.1.v3.2 annot-version=v3.1.1	internal	0.00167611	0.35049	-2.41504	-0.459432	0.0113316	0.709048	0.0113316
311	GRMZM2G119782_P01/Sobic.004G327800.1.p	969	1	39.0476	1178	3	3	42	34	19	4	4	4	3	4	15	3	4	3	2	3	14	3	1	1	0	0	1	11	2	2	4	2	1	pacid=30983282	external	0.00173835	0.45432	1.28011	-0.241008	0.0116528	0.800371	0.0116528
20	GRMZM2G005024_P01,GRMZM2G169593_P01,GRMZM2G169593_P03,GRMZM2G169593_P02,Sobic.007G032000.1.p	747	5	8.15233	873	3	3	11	10	0	0	0	0	0	0	10	1	1	3	2	3	1	0	0	0	0	0	0	1	0	0	0	0	1	pacid=37934255 transcript=Sobic.007G032000.1 locus=Sobic.007G032000 ID=Sobic.007G032000.1.v3.2 annot-version=v3.1.1	internal	0.00179546	0.996082	3.32193	#NAME?	0.0119345	1	0.0119345
562	GRMZM5G840582_P03,GRMZM5G840582_P02,GRMZM5G840582_P01/Sobic.002G006600.1.p	1363	3	18.4395	1891	6	7	34	23	9	2	2	3	0	2	14	2	4	2	4	2	55	34	11	6	9	3	5	21	6	4	3	3	5	pacid=30974631	external	0.00196609	0.359908	-1.2578	0.296982	0.0129598	0.715436	0.0129598
214	GRMZM2G107362_P04,GRMZM2G107362_P02,Sobic.004G086600.1.p	907	3	25.462	1086	7	7	97	39	20	3	5	5	3	4	19	5	4	3	3	4	58	32	8	5	9	4	6	26	5	5	5	6	5	pacid=37933687 transcript=Sobic.004G086600.1 locus=Sobic.004G086600 ID=Sobic.004G086600.1.v3.2 annot-version=v3.1.1	internal	0.00215323	0.198446	-0.572579	0.208587	0.0140761	0.568457	0.0140761
191	GRMZM2G075624_P01,GRMZM2G108474_P01/Sobic.004G006300.2.p	525	2	36.3095	2072	7	8	84	70	34	9	6	8	3	8	36	5	11	7	6	7	42	21	4	5	4	4	4	21	6	2	5	3	5	pacid=30988841	external	0.00220156	0.797953	0.736966	-0.0515303	0.014274	0.949546	0.014274
447	GRMZM2G174984_P01/Sobic.007G071500.1.p	655	1	25.5814	743	5	8	106	85	43	15	6	8	6	8	42	6	10	7	9	10	127	72	17	12	16	14	13	55	10	13	10	13	9	pacid=31045659	external	0.00231571	0.141484	-0.579294	0.245577	0.0145375	0.50523	0.0145375
591	GRMZM2G017419_P01/Sobic.009G043000.1.p	1793	1	19.337	2758	4	6	68	50	21	4	4	5	4	4	29	5	5	7	6	6	36	20	4	4	4	4	4	16	4	2	3	4	3	pacid=31001609	external	0.00228269	0.318133	0.473931	-0.134301	0.0145375	0.672844	0.0145375
3771	GRMZM2G145850_P01/Sobic.001G115800.1.p	223	1	16.2011	230	2	2	18	18	8	2	2	1	1	2	10	2	2	2	2	2	28	14	2	3	4	3	2	14	2	4	2	3	3	pacid=30988182	external	0.00230437	0.480281	-0.63743	-0.125531	0.0145375	0.807875	0.0145375
281	GRMZM2G107089_P01,GRMZM2G107089_P02/Sobic.002G043600.1.p	271	2	31.0179	290	10	10	51	22	9	3	2	2	0	2	13	3	2	4	2	2	49	25	7	4	7	3	4	24	6	2	8	2	6	pacid=30994023	external	0.0023096	0.688145	-1.15528	-0.121991	0.0145375	0.909531	0.0145375
1711	GRMZM2G070605_P01/Sobic.003G002300.1.p,Sobic.003G002300.2.p	690	1	6.17284	794	2	4	36	27	13	3	3	3	1	3	14	3	2	3	2	4	14	6	2	0	2	1	1	8	2	1	1	2	2	pacid=30982361	external	0.00235887	0.413704	0.947533	-0.211504	0.0146918	0.759956	0.0146918
49	GRMZM2G018403_P01,GRMZM2G054149_P01,Sobic.004G116100.1.p	590	3	26.9164	663	5	5	50	33	18	4	4	4	2	4	15	3	3	4	4	1	17	8	1	3	1	2	1	9	1	1	2	2	3	pacid=37931985 transcript=Sobic.004G116100.1 locus=Sobic.004G116100 ID=Sobic.004G116100.1.v3.2 annot-version=v3.1.1	internal	0.00238465	0.655796	0.956931	0.115477	0.0147364	0.889767	0.0147364
1901	GRMZM2G075333_P01/Sobic.004G062500.1.p	815	1	14.2086	958	7	7	23	22	5	0	1	1	1	2	17	2	4	4	4	3	2	1	0	0	0	0	1	1	0	0	0	0	1	pacid=30992781	external	0.00243679	0.0206426	3.45943	-1.58496	0.0149419	0.28537	0.0149419
361	GRMZM2G378906_P01,GRMZM2G011101_P01,Sobic.003G134800.1.p	1822	3	8.6225	2824	6	6	43	9	1	0	0	0	0	1	8	1	3	1	1	2	34	22	3	3	5	4	7	12	1	2	4	2	3	pacid=37916515 transcript=Sobic.003G134800.1 locus=Sobic.003G134800 ID=Sobic.003G134800.1.v3.2 annot-version=v3.1.1	internal	0.00283223	0.658855	-1.91754	0.201634	0.017233	0.890861	0.017233
26	GRMZM2G008919_P02,GRMZM2G008919_P03,GRMZM2G008919_P01,Sobic.002G068300.1.p	843	4	16.4022	1001	3	3	56	21	12	4	2	3	1	2	9	2	2	2	2	1	35	18	4	3	4	3	4	17	3	4	5	2	3	pacid=37953149 transcript=Sobic.002G068300.1 locus=Sobic.002G068300 ID=Sobic.002G068300.1.v3.2 annot-version=v3.1.1	internal	0.00287914	0.329621	-0.736966	0.206451	0.0173847	0.684901	0.0173847
59	GRMZM2G024738_P04,GRMZM2G377609_P03,Sobic.003G225100.1.p	1217	3	9.42944	1598	3	3	25	20	8	2	2	2	0	2	12	2	3	2	3	2	5	2	1	0	1	0	0	3	0	1	0	2	0	pacid=37913302 transcript=Sobic.003G225100.1 locus=Sobic.003G225100 ID=Sobic.003G225100.1.v3.2 annot-version=v3.1.1	internal	0.00290821	0.230333	2	-0.584963	0.0174272	0.596468	0.0174272
1351	GRMZM2G052666_P01/Sobic.001G295300.1.p	1168	1	16.5385	1508	4	4	34	30	13	4	3	2	1	3	17	4	2	4	4	3	49	26	7	3	6	4	6	23	6	4	4	4	5	pacid=31008116	external	0.00304613	0.856579	-0.707819	-0.0365259	0.0181165	0.962435	0.0181165
2011	GRMZM2G080650_P01/Sobic.008G078900.1.p	914	1	10.4046	1096	4	4	30	23	14	4	2	3	1	4	9	2	2	2	0	3	41	20	4	5	4	3	4	21	5	3	5	4	4	pacid=31005020	external	0.00310455	0.44881	-0.83399	0.180572	0.0183261	0.797772	0.0183261
711	GRMZM2G023232_P01/Sobic.009G067000.1.p	73	1	19.1211	409	14	15	109	83	36	9	10	10	7	0	47	7	12	9	10	9	39	26	7	2	4	6	7	13	1	3	3	2	4	pacid=31022543	external	0.00319195	0.875043	1.08964	0.0473057	0.0187025	0.968094	0.0187025
140	GRMZM2G061900_P02,GRMZM2G061900_P01,Sobic.009G164700.1.p,Sobic.001G035400.1.p,Sobic.002G084300.2.p	34	5	18.553	2132	4	5	25	20	10	2	2	1	3	2	10	2	2	3	1	2	5	2	0	0	2	0	0	3	1	1	0	1	0	pacid=37955046 transcript=Sobic.002G084300.2 locus=Sobic.002G084300 ID=Sobic.002G084300.2.v3.2 annot-version=v3.1.1	internal	0.00322556	0.807852	2	-0.115477	0.0187604	0.949928	0.0187604
75	GRMZM2G024099_P01/Sobic.001G478100.1.p	612	1	24.3056	930	7	7	52	22	3	2	0	0	0	1	19	3	5	4	3	4	50	25	6	4	7	3	5	25	6	3	6	5	5	pacid=31015740	external	0.00326235	0.0625992	-1.18442	-0.652077	0.0188359	0.402895	0.0188359
1871	GRMZM2G074282_P02/Sobic.004G001300.1.p	275	1	31.2039	1976	11	14	118	63	25	7	4	6	2	6	38	5	9	6	8	10	99	47	12	8	12	6	9	52	13	7	12	9	11	pacid=30988561	external	0.00329463	0.103805	-0.652077	-0.321928	0.0188844	0.464327	0.0188844
327	GRMZM2G177923_P01,Sobic.006G157700.1.p	1197	2	2.47236	1560	2	2	16	13	5	1	2	1	0	1	8	1	2	2	1	2	3	0	0	0	0	0	0	3	0	1	0	1	1	pacid=37945403 transcript=Sobic.006G157700.1 locus=Sobic.006G157700 ID=Sobic.006G157700.1.v3.2 annot-version=v3.1.1	internal	0.00342888	0.0445337	2.11548	-1.1375	0.0195125	0.332323	0.0195125
446	GRMZM2G174757_P01/Sobic.001G291800.1.p	443	1	9.70874	2313	6	6	18	18	5	1	2	1	0	1	13	3	3	2	4	1	3	0	0	0	0	0	0	3	0	0	2	0	1	pacid=31019215	external	0.0035993	0.0162751	2.58496	-1.67807	0.020336	0.25924	0.020336
436	GRMZM2G170336_P01,GRMZM2G170336_P02/Sobic.001G436200.1.p	840	2	18.7531	1357	5	5	67	29	16	4	3	3	3	3	13	2	3	3	3	2	39	19	3	4	4	3	5	20	5	4	3	4	4	pacid=31010004	external	0.00371094	0.509073	-0.427421	0.0848889	0.0206721	0.821789	0.0206721
581	GRMZM5G892522_P01/Sobic.006G265900.1.p	29	1	17.0454	81	2	2	17	17	9	2	1	3	1	2	8	1	1	2	2	2	1	0	0	0	0	0	0	1	0	0	1	0	0	pacid=31001594	external	0.00371105	1	4.08746	0	0.0206721	1	0.0206721
126	GRMZM2G056569_P01,Sobic.002G428200.1.p	897	2	15.625	1252	6	6	33	12	5	1	1	1	1	1	7	1	2	2	1	1	21	11	2	3	3	1	2	10	2	2	3	2	1	pacid=37955135 transcript=Sobic.002G428200.1 locus=Sobic.002G428200 ID=Sobic.002G428200.1.v3.2 annot-version=v3.1.1	internal	0.00379049	0.710744	-0.807355	-0.0874628	0.020967	0.920608	0.020967
4081	GRMZM2G158394_P01,GRMZM2G158394_P02,GRMZM2G158394_P04/Sobic.002G278800.1.p	1081	3	8.94947	1358	2	2	21	21	12	4	3	2	1	2	9	1	2	2	2	2	4	0	0	0	0	0	0	4	1	0	0	1	2	pacid=30996556	external	0.00387266	0.828671	2.39232	-0.115477	0.0212727	0.956783	0.0212727
437	GRMZM2G170812_P01/Sobic.001G368600.1.p	422	1	21.0682	1298	6	6	55	47	19	7	2	2	2	6	28	5	7	5	5	6	19	4	3	0	1	0	0	15	4	2	3	4	2	pacid=31040259	external	0.00401946	0.0272076	1.30666	-0.902703	0.0216285	0.290827	0.0216285
502	GRMZM2G391936_P05,GRMZM2G391936_P02/Sobic.001G100000.1.p	36	2	49.8024	905	20	23	215	114	49	13	9	11	5	11	65	11	19	11	12	12	172	79	22	16	20	6	15	93	17	18	20	20	18	pacid=31008454	external	0.003983	0.101692	-0.593375	-0.303781	0.0216285	0.464327	0.0216285
532	GRMZM2G458824_P03,GRMZM2G458824_P01/Sobic.003G146500.2.p,Sobic.003G146500.1.p	908	2	15.6156	1087	4	4	38	32	14	5	3	3	0	3	18	3	5	2	3	5	16	7	1	2	1	2	1	9	2	2	1	2	2	pacid=31006574	external	0.0039944	0.221459	1	-0.36257	0.0216285	0.581436	0.0216285
3721	GRMZM2G143870_P02,GRMZM2G143870_P01/Sobic.002G152800.1.p	1429	2	22.1372	2071	7	10	88	60	28	7	7	5	3	6	32	4	6	7	9	6	36	18	4	3	4	3	4	18	5	1	6	2	4	pacid=30997698	external	0.00411453	0.58412	0.736966	-0.120294	0.0219905	0.855739	0.0219905
444	GRMZM2G172410_P01/Sobic.001G495300.1.p	1796	1	10.3763	2767	8	8	32	12	2	1	1	0	0	0	10	2	5	1	1	1	39	21	5	2	3	5	6	18	5	2	5	3	3	pacid=31016324	external	0.00437514	0.528801	-1.70044	-0.283793	0.0230716	0.829183	0.0230716
3261	GRMZM2G126128_P01/Sobic.007G095500.1.p	714	1	18.8312	833	4	4	15	15	5	1	1	1	1	1	10	1	2	3	2	2	3	3	0	1	1	1	0	0	0	0	0	0	0	pacid=31047078	external	0.00436692	0.551665	2.32193	-0.321928	0.0230716	0.839168	0.0230716
321	GRMZM2G171444_P01,Sobic.004G298100.1.p	614	2	11.0129	695	2	2	30	24	13	3	3	3	4	0	11	2	2	3	2	2	6	0	0	0	0	0	0	6	1	2	2	0	1	pacid=37930615 transcript=Sobic.004G298100.1 locus=Sobic.004G298100 ID=Sobic.004G298100.1.v3.2 annot-version=v3.1.1	internal	0.00440937	0.442424	2	-0.387023	0.0230964	0.788192	0.0230964
450	GRMZM2G176903_P01,GRMZM2G176903_P02/Sobic.003G222200.1.p	97	2	23.6699	2886	7	7	78	36	23	4	4	6	3	6	13	2	3	3	3	2	62	28	8	5	7	3	5	34	5	5	7	7	10	pacid=31035502	external	0.00443824	0.616363	-0.784271	0.117836	0.0230964	0.859865	0.0230964
791	GRMZM2G025171_P02,GRMZM2G025171_P01/Sobic.004G235200.1.p	1284	2	31.0757	1742	7	10	120	69	26	9	4	6	3	4	43	6	8	10	7	12	104	45	11	10	9	6	9	59	15	9	14	10	11	pacid=31045633	external	0.00471153	0.010327	-0.591915	-0.522678	0.0240073	0.22318	0.0240073
3541	GRMZM2G135283_P04,GRMZM2G135283_P03/Sobic.001G097100.3.p,Sobic.001G097100.4.p	254	2	25.0973	1578	10	11	110	58	24	5	6	5	2	6	34	3	9	8	6	8	93	46	12	5	12	7	10	47	9	7	12	8	11	pacid=31011932	external	0.00473469	0.317754	-0.681178	-0.210567	0.0240073	0.672844	0.0240073
2031	GRMZM2G081268_P03,GRMZM2G081268_P02,GRMZM2G081268_P01/Sobic.004G127600.1.p,Sobic.004G127600.2.p	74	3	23.7537	261	7	8	60	51	26	6	6	4	4	6	25	5	8	4	5	3	34	19	5	4	3	3	4	15	3	2	3	4	3	pacid=30989847	external	0.00473409	0.349905	0.584963	0.169925	0.0240073	0.709048	0.0240073
3461	GRMZM2G132506_P01/Sobic.003G419900.1.p	846	1	18.8889	3137	3	4	52	28	13	4	1	2	4	2	15	2	3	3	4	3	47	26	5	6	6	3	6	21	5	2	5	3	6	pacid=31035601	external	0.00467056	0.61016	-0.747234	0.115477	0.0240073	0.855739	0.0240073
391	GRMZM2G701221_P01,Sobic.009G188300.1.p	184	2	8.42912	1164	2	2	13	1	1	0	0	1	0	0	0	0	0	0	0	0	12	8	2	1	3	1	1	4	1	1	0	1	1	pacid=37922384 transcript=Sobic.009G188300.1 locus=Sobic.009G188300 ID=Sobic.009G188300.1.v3.2 annot-version=v3.1.1	internal	0.00488367	0.0852286	-3.58496	1.16993	0.024605	0.4504	0.024605
497	GRMZM2G376731_P01/Sobic.006G280000.1.p	1078	1	2.80269	1947	2	2	29	14	6	1	2	2	0	1	8	2	1	2	2	1	25	13	3	2	3	3	2	12	3	1	2	3	3	pacid=30970953	external	0.00496481	0.76981	-0.836501	-0.0740006	0.0248555	0.942829	0.0248555
300	GRMZM2G157462_P01,Sobic.010G101800.1.p	1209	2	5.68928	2360	5	5	42	14	8	2	2	2	2	0	6	1	0	1	2	2	28	16	4	2	4	3	3	12	2	4	1	3	2	pacid=37909341 transcript=Sobic.010G101800.1 locus=Sobic.010G101800 ID=Sobic.010G101800.1.v3.2 annot-version=v3.1.1	internal	0.00508034	0.179266	-1	0.415037	0.0252739	0.551748	0.0252739
227	GRMZM2G115176_P01,GRMZM2G115176_P03,GRMZM5G884325_P01,GRMZM5G884325_P02,GRMZM2G115925_P01,Sobic.004G002350.1.p,Sobic.001G440900.1.p	2029	7	31.2798	3314	4	5	41	13	5	0	0	2	2	1	8	2	1	1	2	2	28	16	5	1	4	3	3	12	2	2	3	3	2	pacid=37943135 transcript=Sobic.001G440900.1 locus=Sobic.001G440900 ID=Sobic.001G440900.1.v3.2 annot-version=v3.1.1	internal	0.00529072	0.829777	-1.10692	0.0703893	0.026156	0.956783	0.026156
156	GRMZM2G059314_P01,GRMZM2G059314_P04/Sobic.009G161100.1.p	445	2	7.92832	537	2	2	10	6	4	2	1	0	0	1	2	0	0	1	0	1	21	10	2	1	4	0	3	11	2	2	3	2	2	pacid=31022014	external	0.00537264	0.823339	-1.80735	0.106915	0.026396	0.953556	0.026396
388	GRMZM2G540538_P01,Sobic.004G220000.1.p	603	2	31.7784	3061	10	11	152	60	27	8	6	6	1	6	33	5	9	7	7	5	92	51	10	12	12	7	10	41	9	9	5	9	9	pacid=37933236 transcript=Sobic.004G220000.1 locus=Sobic.004G220000 ID=Sobic.004G220000.1.v3.2 annot-version=v3.1.1	internal	0.00542917	0.693406	-0.616671	0.0759489	0.0265091	0.91414	0.0265091
3921	GRMZM2G150893_P02,GRMZM2G150893_P01/Sobic.001G277000.1.p	1488	2	11.9351	2160	3	4	22	22	8	2	2	1	1	2	14	4	3	2	2	3	12	4	1	1	1	1	0	8	1	2	1	3	1	pacid=30992946	external	0.00546528	0.00546539	0.874469	-0.874469	0.0265217	0.166274	0.0265217
506	GRMZM2G401664_P01/Sobic.002G277900.1.p	1519	1	13.4731	2218	4	4	32	25	11	3	2	1	1	4	14	4	2	3	3	2	10	6	3	1	1	0	1	4	0	1	1	1	1	pacid=30995443	external	0.00596919	0.831016	1.32193	-0.0824622	0.0287904	0.956817	0.0287904
40	GRMZM2G014376_P01,GRMZM2G014376_P03,GRMZM2G014376_P02,Sobic.008G116000.4.p	1969	4	10.0612	3187	5	5	33	24	12	2	3	2	2	3	12	4	2	2	2	2	9	6	0	2	0	3	1	3	0	1	1	0	1	pacid=37927382 transcript=Sobic.008G116000.4 locus=Sobic.008G116000 ID=Sobic.008G116000.4.v3.2 annot-version=v3.1.1	internal	0.00633463	0.526382	1.41504	0.263034	0.0303678	0.829183	0.0303678
3171	GRMZM2G121878_P02,GRMZM2G121878_P01/Sobic.003G234200.6.p	351	2	73.2892	2646	31	45	667	440	217	43	45	56	24	49	223	40	53	44	44	42	608	296	80	53	73	33	57	312	69	44	73	58	68	pacid=31032393	external	0.0063883	0.68779	-0.466568	-0.0605801	0.0304406	0.909531	0.0304406
176	GRMZM2G071333_P01/Sobic.001G407700.2.p,Sobic.001G407700.1.p	1006	1	8.15765	1289	8	8	29	27	12	2	3	3	0	4	15	3	3	2	3	4	7	6	0	3	2	1	0	1	0	1	0	0	0	pacid=30968185	external	0.00683999	0.744432	1.94753	0.169925	0.0323978	0.939356	0.0323978
555	GRMZM5G824944_P02,GRMZM5G824944_P01/Sobic.002G220200.2.p	420	2	15.2516	1713	8	8	52	41	20	5	6	4	1	4	21	3	2	6	5	5	21	11	0	3	4	2	2	10	1	2	3	2	2	pacid=30997039	external	0.00704055	1	0.965235	0	0.0331493	1	0.0331493
508	GRMZM2G015285_P01/Sobic.005G172400.1.p,Sobic.005G172400.2.p	1945	1	32.2344	3136	8	8	108	71	37	7	6	9	7	8	34	7	5	7	9	6	88	49	12	9	10	9	9	39	8	9	7	7	8	pacid=30973860	external	0.00709982	0.031666	-0.309684	0.23644	0.0332305	0.307507	0.0332305
578	GRMZM5G884912_P01,GRMZM2G109418_P01,GRMZM2G470035_P01,GRMZM2G066111_P01/Sobic.K032200.1.p	1494	4	19.0049	2167	3	4	16	16	7	3	1	1	1	1	9	1	3	1	3	1	31	19	3	4	3	5	4	12	1	2	3	3	3	pacid=31041630	external	0.00727718	0.316306	-0.954196	0.308122	0.0338603	0.672844	0.0338603
1741	GRMZM2G071071_P01/Sobic.001G042200.1.p,Sobic.001G042200.2.p	310	1	23.9198	3123	10	11	83	29	12	4	3	3	0	2	17	2	4	3	5	3	59	35	12	5	9	3	6	24	2	4	7	5	6	pacid=30990878	external	0.007387	0.543166	-1.02466	0.197037	0.0341703	0.833469	0.0341703
583	GRMZM6G630632_P03/Sobic.002G000500.1.p	876	1	11.0132	1046	2	2	30	14	4	2	0	2	0	0	10	2	3	2	2	1	32	19	4	3	5	3	4	13	5	1	2	2	3	pacid=31019746	external	0.00751448	1	-1.19265	0	0.0345579	1	0.0345579
411	GRMZM5G851815_P02,Sobic.007G130400.1.p,Sobic.007G130400.2.p,Sobic.007G130400.3.p	937	4	6.39739	1133	3	3	11	1	1	1	0	0	0	0	0	0	0	0	0	0	10	7	2	1	1	1	2	3	1	1	0	1	0	pacid=37935629 transcript=Sobic.007G130400.3 locus=Sobic.007G130400 ID=Sobic.007G130400.3.v3.2 annot-version=v3.1.1	internal	0.00758886	0.0619717	-3.32193	1.41504	0.0346982	0.402895	0.0346982
1710	GRMZM2G003246_P01/Sobic.002G227700.3.p	718	1	12.0968	839	3	4	15	12	0	0	0	0	0	0	12	1	3	3	2	3	33	18	5	3	4	3	3	15	2	1	5	3	4	pacid=30998643	external	0.00784187	0.198627	-1.45943	-0.584963	0.0354526	0.568457	0.0354526
3501	GRMZM2G133844_P01/Sobic.003G433900.1.p	211	1	25.8278	215	3	3	28	20	9	3	3	2	0	1	11	2	2	3	2	2	33	16	4	3	4	2	3	17	4	2	4	3	4	pacid=30978983	external	0.00788832	0.492502	-0.722466	-0.163499	0.0354526	0.814999	0.0354526
97	GRMZM2G044629_P01,GRMZM2G044629_P02,GRMZM2G019986_P01,Sobic.006G213100.1.p	637	4	9.52254	938	4	4	14	10	0	0	0	0	0	0	10	1	3	2	2	2	4	0	0	0	0	0	0	4	0	1	2	0	1	pacid=37948773 transcript=Sobic.006G213100.1 locus=Sobic.006G213100 ID=Sobic.006G213100.1.v3.2 annot-version=v3.1.1	internal	0.0078788	0.993451	1.32193	#NAME?	0.0354526	1	0.0354526
1941	GRMZM2G077214_P01,GRMZM2G077214_P02/Sobic.001G167900.1.p	1341	2	35.9066	1998	10	11	98	75	31	8	5	7	2	9	44	8	12	9	8	7	48	19	7	2	4	3	3	29	5	5	7	6	6	pacid=31007221	external	0.00811011	0.0203397	0.643856	-0.545968	0.0355524	0.28537	0.0355524
516	GRMZM2G419806_P03,GRMZM2G419806_P01,GRMZM2G419806_P02/Sobic.008G051000.1.p	435	3	38.2516	1301	12	12	134	87	30	10	4	5	3	8	57	9	12	12	12	12	50	23	7	5	6	1	4	27	8	3	9	3	4	pacid=31002299	external	0.00804974	0.0218622	0.799087	-0.664397	0.0355524	0.28537	0.0355524
3361	GRMZM2G128219_P01/Sobic.004G186500.2.p,Sobic.004G186500.3.p	1998	1	11.4114	3255	3	3	12	1	1	0	0	0	0	1	0	0	0	0	0	0	12	8	2	1	2	1	2	4	2	0	1	0	1	pacid=31046142	external	0.00806934	0.108295	-3.58496	1.16993	0.0355524	0.46555	0.0355524
386	GRMZM2G479684_P01,GRMZM2G332838_P01,GRMZM2G332838_P02,GRMZM2G421279_P01,GRMZM2G143780_P03,GRMZM2G143780_P02,GRMZM2G143780_P01,GRMZM2G063896_P01,GRMZM2G063896_P02,AC212565.3_FGP001,AC233865.1_FGP001,AC196961.2_FGP003,GRMZM2G072855_P01,GRMZM2G073275_P01,GRMZM2G149178_P01,GRMZM2G181153_P01,GRMZM2G016232_P02,GRMZM2G016232_P01,GRMZM2G349651_P02,GRMZM2G349651_P01,GRMZM2G084195_P01,Sobic.003G056600.1.p,…	722	32	44.6706	1611	10	17	278	126	68	13	13	19	11	12	58	13	11	12	10	12	152	77	16	14	17	15	15	75	16	17	14	14	14	pacid=37953233 transcript=Sobic.002G291066.1 locus=Sobic.002G291066 ID=Sobic.002G291066.1.v3.2 annot-version=v3.1.1	internal	0.00813684	0.184256	-0.270648	0.124627	0.0355524	0.558415	0.0355524
1831	GRMZM2G073584_P02/Sobic.008G052200.1.p	782	1	5.87595	1913	5	5	27	21	11	3	2	2	2	2	10	2	1	3	2	2	8	2	0	1	0	0	1	6	3	0	1	1	1	pacid=31028608	external	0.00796142	0.481605	1.39232	-0.29956	0.0355524	0.807875	0.0355524
134	GRMZM2G058244_P01,Sobic.001G171300.1.p,Sobic.001G171300.2.p	1326	3	11.4788	3088	5	5	80	32	19	5	3	5	2	4	13	3	4	2	1	3	48	22	4	5	4	5	4	26	6	5	5	4	6	pacid=37938308 transcript=Sobic.001G171300.2 locus=Sobic.001G171300 ID=Sobic.001G171300.2.v3.2 annot-version=v3.1.1	internal	0.0081802	0.711114	-0.584963	0.0721498	0.0355524	0.920608	0.0355524
95	GRMZM2G044237_P03,GRMZM2G044237_P02,GRMZM2G044237_P01,Sobic.001G416700.1.p	1406	4	8.93913	1987	3	3	35	13	8	2	1	2	1	2	5	1	1	1	1	1	22	13	3	3	4	1	2	9	2	1	3	2	1	pacid=37940447 transcript=Sobic.001G416700.1 locus=Sobic.001G416700 ID=Sobic.001G416700.1.v3.2 annot-version=v3.1.1	internal	0.00853353	0.0328373	-0.758992	0.584963	0.0368854	0.308858	0.0368854
155	GRMZM2G070863_P01,Sobic.006G161400.1.p	1422	2	3.27022	2033	2	2	21	17	8	3	2	2	0	1	9	2	1	2	2	2	4	0	0	0	0	0	0	4	0	2	0	1	1	pacid=37949151 transcript=Sobic.006G161400.1 locus=Sobic.006G161400 ID=Sobic.006G161400.1.v3.2 annot-version=v3.1.1	internal	0.00863601	0.234981	2.08746	-0.70044	0.0369603	0.596468	0.0369603
366	GRMZM2G140667_P01,GRMZM2G140667_P02/Sobic.002G431100.1.p	169	2	43.8618	767	11	15	151	75	39	10	8	7	5	9	36	4	6	7	9	10	104	54	11	11	14	8	10	50	12	7	12	8	11	pacid=30974494	external	0.00867548	0.482069	-0.471621	0.112894	0.0369603	0.807875	0.0369603
100	GRMZM2G034243_P01/Sobic.001G498300.1.p	21	1	33.1461	18	9	13	117	107	52	13	10	12	6	11	55	8	12	12	13	10	79	38	10	8	9	5	6	41	8	6	10	7	10	pacid=31039024	external	0.00869104	0.53227	0.437686	-0.0931094	0.0369603	0.829183	0.0369603
510	GRMZM2G412470_P02/Sobic.007G023700.1.p	974	1	9.43135	1186	5	5	43	17	9	3	1	2	0	3	8	1	2	1	2	2	36	19	7	1	5	2	4	17	2	2	4	4	5	pacid=31024430	external	0.00884802	0.639096	-1.08246	0.163499	0.0374266	0.875528	0.0374266
197	GRMZM2G096812_P01,Sobic.009G252400.1.p	350	2	8.80774	2558	3	3	16	4	0	0	0	0	0	0	4	1	1	1	1	0	12	7	1	1	2	1	2	5	1	1	1	1	1	pacid=37921852 transcript=Sobic.009G252400.1 locus=Sobic.009G252400 ID=Sobic.009G252400.1.v3.2 annot-version=v3.1.1	internal	0.00894191	0.449934	-1.58496	-0.36257	0.0376226	0.797976	0.0376226
215	GRMZM2G107639_P02,GRMZM2G107639_P01,Sobic.003G045600.1.p,Sobic.003G045600.3.p,Sobic.003G045600.4.p,Sobic.003G045600.5.p,Sobic.003G045600.6.p	1737	7	13.947	2638	4	5	20	2	1	1	0	0	0	0	1	0	0	0	0	1	18	13	5	1	4	1	2	5	1	0	1	1	2	pacid=37913832 transcript=Sobic.003G045600.6 locus=Sobic.003G045600 ID=Sobic.003G045600.6.v3.2 annot-version=v3.1.1	internal	0.0090613	0.100913	-3.16993	1.22239	0.0379232	0.464327	0.0379232
2131	GRMZM2G085019_P01,GRMZM2G085019_P02/Sobic.003G036200.1.p	65	2	44.25	2125	29	41	377	316	128	38	18	25	14	33	188	30	49	35	31	43	220	92	26	15	23	10	18	128	27	20	30	27	24	pacid=31029963	external	0.00950653	0.00950652	0.522421	-0.522421	0.0395772	0.22318	0.0395772
174	GRMZM2G084521_P03,GRMZM2G084521_P01,Sobic.010G258000.1.p	1298	3	29.1827	1767	5	7	89	36	17	4	3	5	1	4	19	4	5	3	4	3	53	26	7	4	6	5	4	27	6	3	7	5	6	pacid=37912106 transcript=Sobic.010G258000.1 locus=Sobic.010G258000 ID=Sobic.010G258000.1.v3.2 annot-version=v3.1.1	internal	0.00972949	0.611923	-0.557995	-0.0972972	0.0398758	0.856692	0.0398758
329	GRMZM2G178341_P01,Sobic.001G058900.1.p	1047	2	34.6405	3065	5	8	135	60	29	7	6	6	4	6	31	5	6	6	6	8	75	38	9	7	9	6	7	37	8	6	7	7	9	pacid=37944956 transcript=Sobic.001G058900.1 locus=Sobic.001G058900 ID=Sobic.001G058900.1.v3.2 annot-version=v3.1.1	internal	0.00971788	0.848077	-0.321928	-0.0213737	0.0398758	0.962435	0.0398758
477	GRMZM2G327595_P01,GRMZM2G433767_P02,GRMZM2G433767_P01/Sobic.002G401200.2.p	217	3	4.51751	223	2	2	20	11	5	1	2	1	1	0	6	1	1	1	2	1	19	10	2	2	2	3	1	9	2	1	2	2	2	pacid=30996339	external	0.00964576	1	-0.788496	0	0.0398758	1	0.0398758
507	GRMZM2G405459_P02,GRMZM2G405459_P01/Sobic.004G105100.1.p	96	2	24.7753	93	5	7	30	23	4	1	1	1	0	1	19	1	2	7	4	5	8	2	0	1	0	1	0	6	2	0	1	1	2	pacid=30992897	external	0.00980086	0.00247365	1.52356	-2.05889	0.0399612	0.121372	0.0399612
2191	GRMZM2G087570_P01/Sobic.009G001500.1.p	1817	1	29.3651	2806	6	11	194	99	43	12	8	10	4	9	56	11	13	10	12	10	138	72	14	16	19	8	15	66	17	14	13	12	10	pacid=31021634	external	0.00994877	0.607758	-0.479168	-0.0852473	0.0403563	0.855739	0.0403563
293	GRMZM2G155384_P02,Sobic.004G039600.1.p	344	2	14.3177	375	11	11	92	34	15	5	4	2	1	3	19	3	4	5	3	4	58	32	9	2	9	5	7	26	3	6	6	7	4	pacid=37932115 transcript=Sobic.004G039600.1 locus=Sobic.004G039600 ID=Sobic.004G039600.1.v3.2 annot-version=v3.1.1	internal	0.0105984	0.811625	-0.770518	0.0627358	0.0427723	0.949928	0.0427723
340	GRMZM2G316113_P01,GRMZM2G316113_P02,GRMZM2G316113_P05,Sobic.003G274400.1.p	1100	4	7.90237	1388	3	3	28	6	3	2	0	0	0	1	3	0	1	0	2	0	22	15	4	3	4	1	3	7	2	0	2	1	2	pacid=37917526 transcript=Sobic.003G274400.1 locus=Sobic.003G274400 ID=Sobic.003G274400.1.v3.2 annot-version=v3.1.1	internal	0.0106669	0.148166	-1.87447	0.847997	0.04283	0.509483	0.04283
283	GRMZM2G148872_P03,GRMZM2G148872_P02,GRMZM2G148872_P01,Sobic.010G181300.1.p	1087	4	13.1514	1368	4	4	29	8	3	1	1	1	0	0	5	0	0	2	2	1	21	11	4	1	3	1	2	10	2	1	3	2	2	pacid=37909136 transcript=Sobic.010G181300.1 locus=Sobic.010G181300 ID=Sobic.010G181300.1.v3.2 annot-version=v3.1.1	internal	0.0107295	0.82161	-1.39232	-0.0995357	0.0428637	0.953556	0.0428637
445	GRMZM2G172723_P03,GRMZM2G172723_P01/Sobic.007G207800.1.p,Sobic.007G207800.2.p,Sobic.007G207800.3.p	1746	2	26.07	2660	4	4	10	2	1	1	0	0	0	0	1	0	0	0	1	0	14	8	2	1	3	0	2	6	2	1	0	2	1	pacid=31013970	external	0.0107893	0.586487	-2.80735	0.36257	0.0428861	0.855739	0.0428861
53	GRMZM2G015989_P02,GRMZM2G015989_P01/Sobic.004G002200.1.p,Sobic.004G002200.2.p	152	2	21.1221	147	9	10	121	71	31	7	6	5	6	7	40	6	8	8	7	11	53	28	6	7	6	4	5	25	7	4	5	4	5	pacid=31044386	external	0.0110677	0.353891	0.421827	-0.139725	0.0437727	0.712285	0.0437727
2721	GRMZM2G104394_P01/Sobic.003G151900.1.p	1244	1	22.2826	1650	6	7	38	15	4	2	1	0	1	0	11	2	4	1	0	4	40	26	3	6	6	5	6	14	5	2	4	2	1	pacid=31028519	external	0.011267	0.562556	-1.41504	0.263034	0.0443392	0.84437	0.0443392
393	GRMZM5G800980_P01,GRMZM2G448142_P01,GRMZM2G304947_P01,Sobic.003G172966.1.p	1287	4	10.131	1746	2	3	27	18	5	1	0	1	2	1	13	2	2	3	4	2	9	3	0	1	0	1	1	6	1	1	1	1	2	pacid=37914548 transcript=Sobic.003G172966.1 locus=Sobic.003G172966 ID=Sobic.003G172966.1.v3.2 annot-version=v3.1.1	internal	0.0114931	0.00323656	1	-1.24793	0.0450052	0.127448	0.0450052
1291	GRMZM2G048907_P01/Sobic.002G316700.1.p	469	1	30.2381	524	15	23	359	228	107	26	22	18	17	24	121	23	27	25	24	22	190	92	15	18	23	20	16	98	22	17	22	16	21	pacid=30994146	external	0.0118903	0.15618	0.263034	-0.138162	0.0463312	0.516896	0.0463312
610	AC211737.3_FGP012/Sobic.004G290000.1.p	293	1	17.1631	320	10	10	53	27	15	3	4	2	3	3	12	3	3	1	3	2	52	29	11	5	9	0	4	23	6	3	4	4	6	pacid=30984741	external	0.0121423	0.319169	-0.945552	0.330149	0.047081	0.673233	0.047081
2711	GRMZM2G104310_P03,GRMZM2G104310_P01/Sobic.008G039900.1.p	882	2	14.7692	1056	12	12	106	58	20	5	2	4	2	7	38	5	10	7	9	7	90	41	12	5	10	6	8	49	8	11	12	12	6	pacid=31004763	external	0.0126962	0.0365605	-0.633872	-0.512206	0.0485429	0.308858	0.0485429
1991	GRMZM2G079348_P02,GRMZM2G079348_P01,GRMZM2G079348_P04,GRMZM2G079348_P03/Sobic.004G011566.1.p,Sobic.004G011566.2.p	10	4	17.5163	10	8	13	175	123	57	14	12	12	5	14	66	13	17	13	12	11	90	41	10	8	12	5	6	49	9	8	11	10	11	pacid=31048385	external	0.0127034	0.168328	0.450661	-0.23078	0.0485429	0.534727	0.0485429
94	GRMZM2G044137_P01,GRMZM2G044137_P02,Sobic.009G179100.1.p	1161	3	26.6277	1495	2	3	23	8	4	1	1	1	0	1	4	1	1	1	1	0	15	6	1	1	2	1	1	9	2	1	2	1	3	pacid=37922397 transcript=Sobic.009G179100.1 locus=Sobic.009G179100 ID=Sobic.009G179100.1.v3.2 annot-version=v3.1.1	internal	0.0126405	0.242537	-0.906891	-0.378512	0.0485429	0.607111	0.0485429
